# Supplementary material for: Switchable inhibitory behavior of divalent magnesium ion in DNA hybridization-based gene quantification
Source: Royal Society of Chemistry journal article supplement (doi:10.1039/d2an01164f), 2022-01-01
Supplement: d2an01164f1.pdf [file d2an01164f1.pdf]

**Switchable inhibitory behavior of divalent magnesium ion in DNA  
hybridization-based gene quantification**

*<sup>1</sup>Hyowon Jin, <sup>1,2</sup>Hyun Jeong Lim, <sup>3</sup>Mark. R. Liles, <sup>4,\*</sup>Beelee Chua, and <sup>1,\*</sup>Ahjeong Son*

<sup>1</sup>Department of Environmental Science and Engineering, Ewha Womans University, Seoul  
03760, Republic of Korea

<sup>2</sup>Department of Chemical and Environmental Engineering, Yale University, New Haven, CT  
06511, USA

<sup>3</sup>Department of Biological Sciences, Auburn University, Auburn, AL 36849, USA

<sup>4</sup>School of Electrical Engineering, Korea University, Seoul 02841, Republic of Korea

\*Corresponding Author (B. Chua): 145 Anam-ro, Seongbuk-gu, Korea University, Seoul 02841,  
Republic of Korea; E-mail. [bchua@korea.ac.kr](mailto:bchua@korea.ac.kr); [chuabeelee@gmail.com](mailto:chuabeelee@gmail.com), Phone. +82 (2) 3290-  
4639

\*Corresponding Author (A. Son): 52 Ewhayeodae-gil, Seodaemun-gu, Ewha Womans  
University, Seoul 03760, Republic of Korea; E-mail. [ason@ewha.ac.kr](mailto:ason@ewha.ac.kr),  
[ahjeong.son@gmail.com](mailto:ahjeong.son@gmail.com); Phone. +82 (2) 3277-3339

## Supplementary Information`

### *NanoGene assay*

The NanoGene assay consists of probe and signaling DNAs each tethered to a quantum dot of a different emission wavelength. The quantum dots' emission wavelengths are 565 and 655 nm and the respective quantum dots are denoted as QD<sub>565</sub> and QD<sub>655</sub>, respectively. The probe DNA-QD<sub>565</sub> complex is further attached to a magnetic bead (MB). Both probe and signaling DNAs have sequences that are designed to capture a specific target DNA. In this way, the target DNA will be hybridized with both probe and signaling DNAs, hence linking them together. A magnetic field is used to hold the MB-QD<sub>565</sub>-probe DNA complex and MB-QD<sub>565</sub>-probe DNA-signaling DNA-QD<sub>655</sub> complex in place while the unlinked signaling DNA-QD<sub>655</sub> complexes are rinsed away. In this way, the fluorescence ratio of QD<sub>655</sub> to QD<sub>565</sub> will be indicative of the quantity of the captured target DNA.
